# Supplementary material for: Comparative Analysis of Chemical Composition, Anti-Inflammatory Activity and Antitumor Activity in Essential Oils from Siegesbeckia orientalis, S. glabrescens and S. pubescens with an ITS Sequence Analysis
Source: Molecules. 2018 Aug 30;23(9):2185. doi: 10.3390/molecules23092185 (PMC6225276; doi:10.3390/molecules23092185)
Supplement: Supplementary file 1 [file molecules-23-02185-s001.pdf]

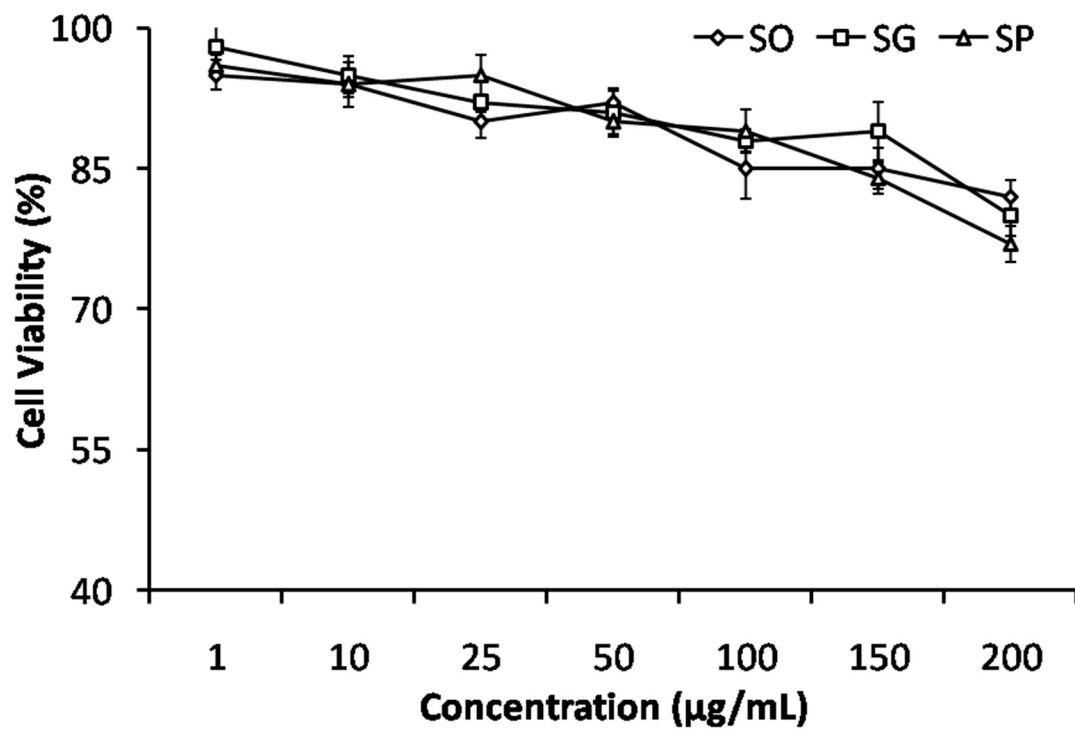

Fig. S1 Effects of SO, SG and SP essential oil on cell viability of RAW264.7

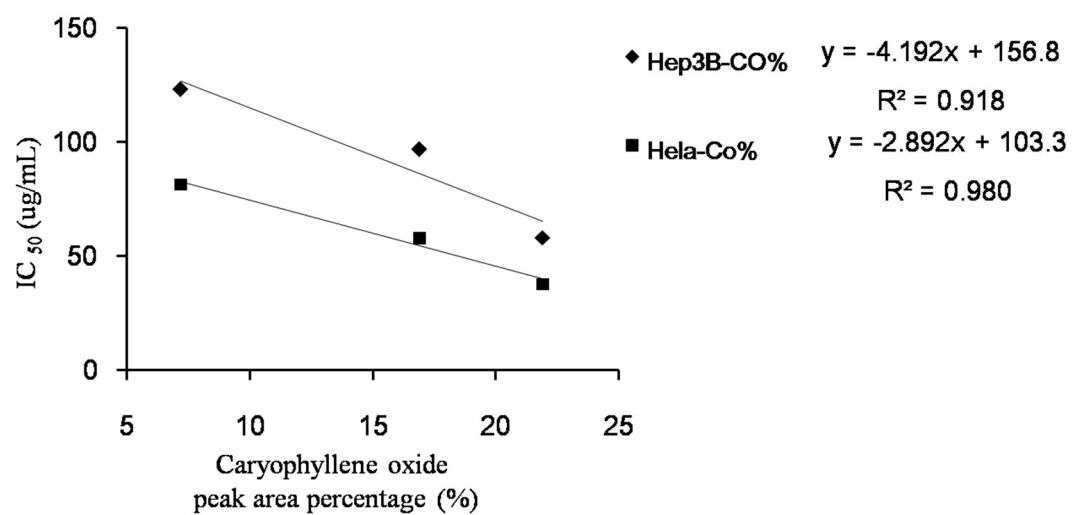

Fig. S2 Linear regression analysis of caryophyllene oxide peak area percentages and  $IC_{50}$  of Hep3B and Hela cytotoxicity.

|               |                                                                                                                            |     |
|---------------|----------------------------------------------------------------------------------------------------------------------------|-----|
| MH701787 (SO) | T CCGT AGGT GAACCT GCGGAGGAT CATT GT CGAAT CCT GCAT AGCAGAACAACCCGT GAACT TGT AC CAACAT CAGGGCTT GCGGGGAGCGAAGCATT         | 100 |
| MH701847 (SG) | T CCGT AGGT GAACCT GCGGAGGAT CATT GT CGAAT CCT GCAT AGCAGAACAACCCGT GAACT TGT AC CAACAT CAGGGCTT GCGGGGAGCGAAGCATT         | 100 |
| MH701848 (SP) | T CCGT AGGT GAACCT GCGGAGGAT CATT GT CGAAT CCT GCAT AGCAGAACAACCCGT GAACT TGT AC CAACAT CAGGGCTT GCGGGGAGCGAAGCATT         | 100 |
| MH701787 (SO) | T GTTT CGATACT CGT TAAGCCT CGCT GACATT GT GTT ACCGT GT GTCTTTT GAGGCCTT GT GGACAT GAAGT TGGCACAACAACAACCCCGGCACGAC         | 200 |
| MH701847 (SG) | T GTTT CGATACT CGT TAAGCCT CGCT GACATT GT GTT ACCGT GT GTCTTTT GAGGCCTT GT GGACAT GAAGT TGGCACAACAACAACCCCGGCACGAC         | 200 |
| MH701848 (SP) | T GTTT CGATACT CGT TAAGCCT CGCT GACATT GT GTT ACCGT GT GTCTTTT GAGGCCTT GT GGACAT GAAGT TGGCACAACAACAACCCCGGCACGAC         | 200 |
| MH701787 (SO) | ACGT GCCAAGGAAAACT AAACCT TAAGAT CCGCT GT GCA GT GACGCCCCGT TATT GGT GT GCGCATT GT GCATGGCTTCTTTGTAACTCTTAAACGACTCTC       | 300 |
| MH701847 (SG) | ACGT GCCAAGGAAAACT AAACCT TAAGAT CCGCT GT GCA GT GACGCCCCGT TATT GGT GT GCGCATT GT GCATGGCTTCTTTGTAACTCTTAAACGACTCTC       | 300 |
| MH701848 (SP) | ACGT GCCAAGGAAAACT AAACCT TAAGAT CCGCT GT GCA GT GACGCCCCGT TATT GGT GT GCGCATT GT GCATGGCTTCTTTGTAACTCTTAAACGACTCTC       | 300 |
| MH701787 (SO) | GGCAACGGAT ATCT CGGCT CACGCAT CGAT GAAGAACGT AGCAAAAT GCGAT ACTT GGT GT GAATT GCAGAAT CCGGT GAACCAT CGAGTTTTTGAACGC        | 400 |
| MH701847 (SG) | GGCAACGGAT ATCT CGGCT CACGCAT CGAT GAAGAACGT AGCAAAAT GCGAT ACTT GGT GT GAATT GCAGAAT CCGGT GAACCAT CGAGTTTTTGAACGC        | 400 |
| MH701848 (SP) | GGCAACGGAT ATCT CGGCT CACGCAT CGAT GAAGAACGT AGCAAAAT GCGAT ACTT GGT GT GAATT GCAGAAT CCGGT GAACCAT CGAGTTTTTGAACGC        | 400 |
| MH701787 (SO) | AAGTT GCGCGT GAAGCCAT CCGGT T GAGGGCACGT CT GCCT GGGCGT CACGCAT CACGT CCCCCCACCAACCGT CCGTGCACGGGACGTTGTTGGACGGG           | 500 |
| MH701847 (SG) | AAGTT GCGCGT GAAGCCAT CCGGT T GAGGGCACGT CT GCCT GGGCGT CACGCAT CACGT CCCCCCACCAACCGT CCGTGCACGGGACGTTGTTGGACGGG           | 500 |
| MH701848 (SP) | AAGTT GCGCGT GAAGCCAT CCGGT T GAGGGCACGT CT GCCT GGGCGT CACGCAT CACGT CCCCCCACCAACCGT CCGTGCACGGGACGTTGTTGGACGGG           | 500 |
| MH701787 (SO) | G CCGGAGATT GGT CT CCCGTT CAT GTT GT GCGGTT GGCCT AAAT AGGAGCCT CCCAAAGGGT ACGCACGGCT AGT GGT GGT T GAT ACAACAGT CGT CT CG | 599 |
| MH701847 (SG) | G CCGGAGATT GGT CT CCCGTT CAT GTT GT GCGGTT GGCCT AAAT AGGAGCCT CCCAAAGGGT ACGCACGGCT AGT GGT GGT T GAT ACAACAGT CGT CT CG | 600 |
| MH701848 (SP) | G CCGGAGATT GGT CT CCCGTT CAT GTT GT GCGGTT GGCCT AAAT AGGAGCCT CCCAAAGGGT ACGCACGGCT AGT GGT GGT T GAT ACAACAGT CGT CT CG | 600 |
| MH701787 (SO) | T GACGT GCGTTT GAT CCTTGGCAGGAACT CTTGAAATACCCCGT CGT GTT GT CT TTTGAT GAT GCTT CGAT CCGACCCCAAGT CAGGCGGGACT ACC          | 698 |
| MH701847 (SG) | T GACGT GCGTTT GAT CCTTGGCAGGAACT CTTGAAATACCCCGT CGT GTT GT CT TTTGAT GAT GCTT CGAT CCGACCCCAAGT CAGGCGGGACT ACC          | 700 |
| MH701848 (SP) | T GACGT GCGTTT GAT CCTTGGCAGGAACT CTTGAAATACCCCGT CGT GTT GT CT TTTGAT GAT GCTT CGAT CCGACCCCAAGT CAGGCGGGACT ACC          | 700 |
| MH701787 (SO) | CGCT GAGTTT AAGCAT AT CAAT AAGCGGAGGA                                                                                      | 730 |
| MH701847 (SG) | CGCT GAGTTT AAGCAT AT CAAT AAGCGGAGGA                                                                                      | 732 |
| MH701848 (SP) | CGCT GAGTTT AAGCAT AT CAAT AAGCGGAGGA                                                                                      | 732 |

Fig. S3 Multiple alignment of the ITS1-5.8S-ITS2 sequence of SO, SG and SP
